# Supplementary material
Source: PubMed Central journal article supplement (PMC5527976)
Supplement: NIHMS872127-supplement-1.pdf [file NIHMS872127-supplement-1.pdf]

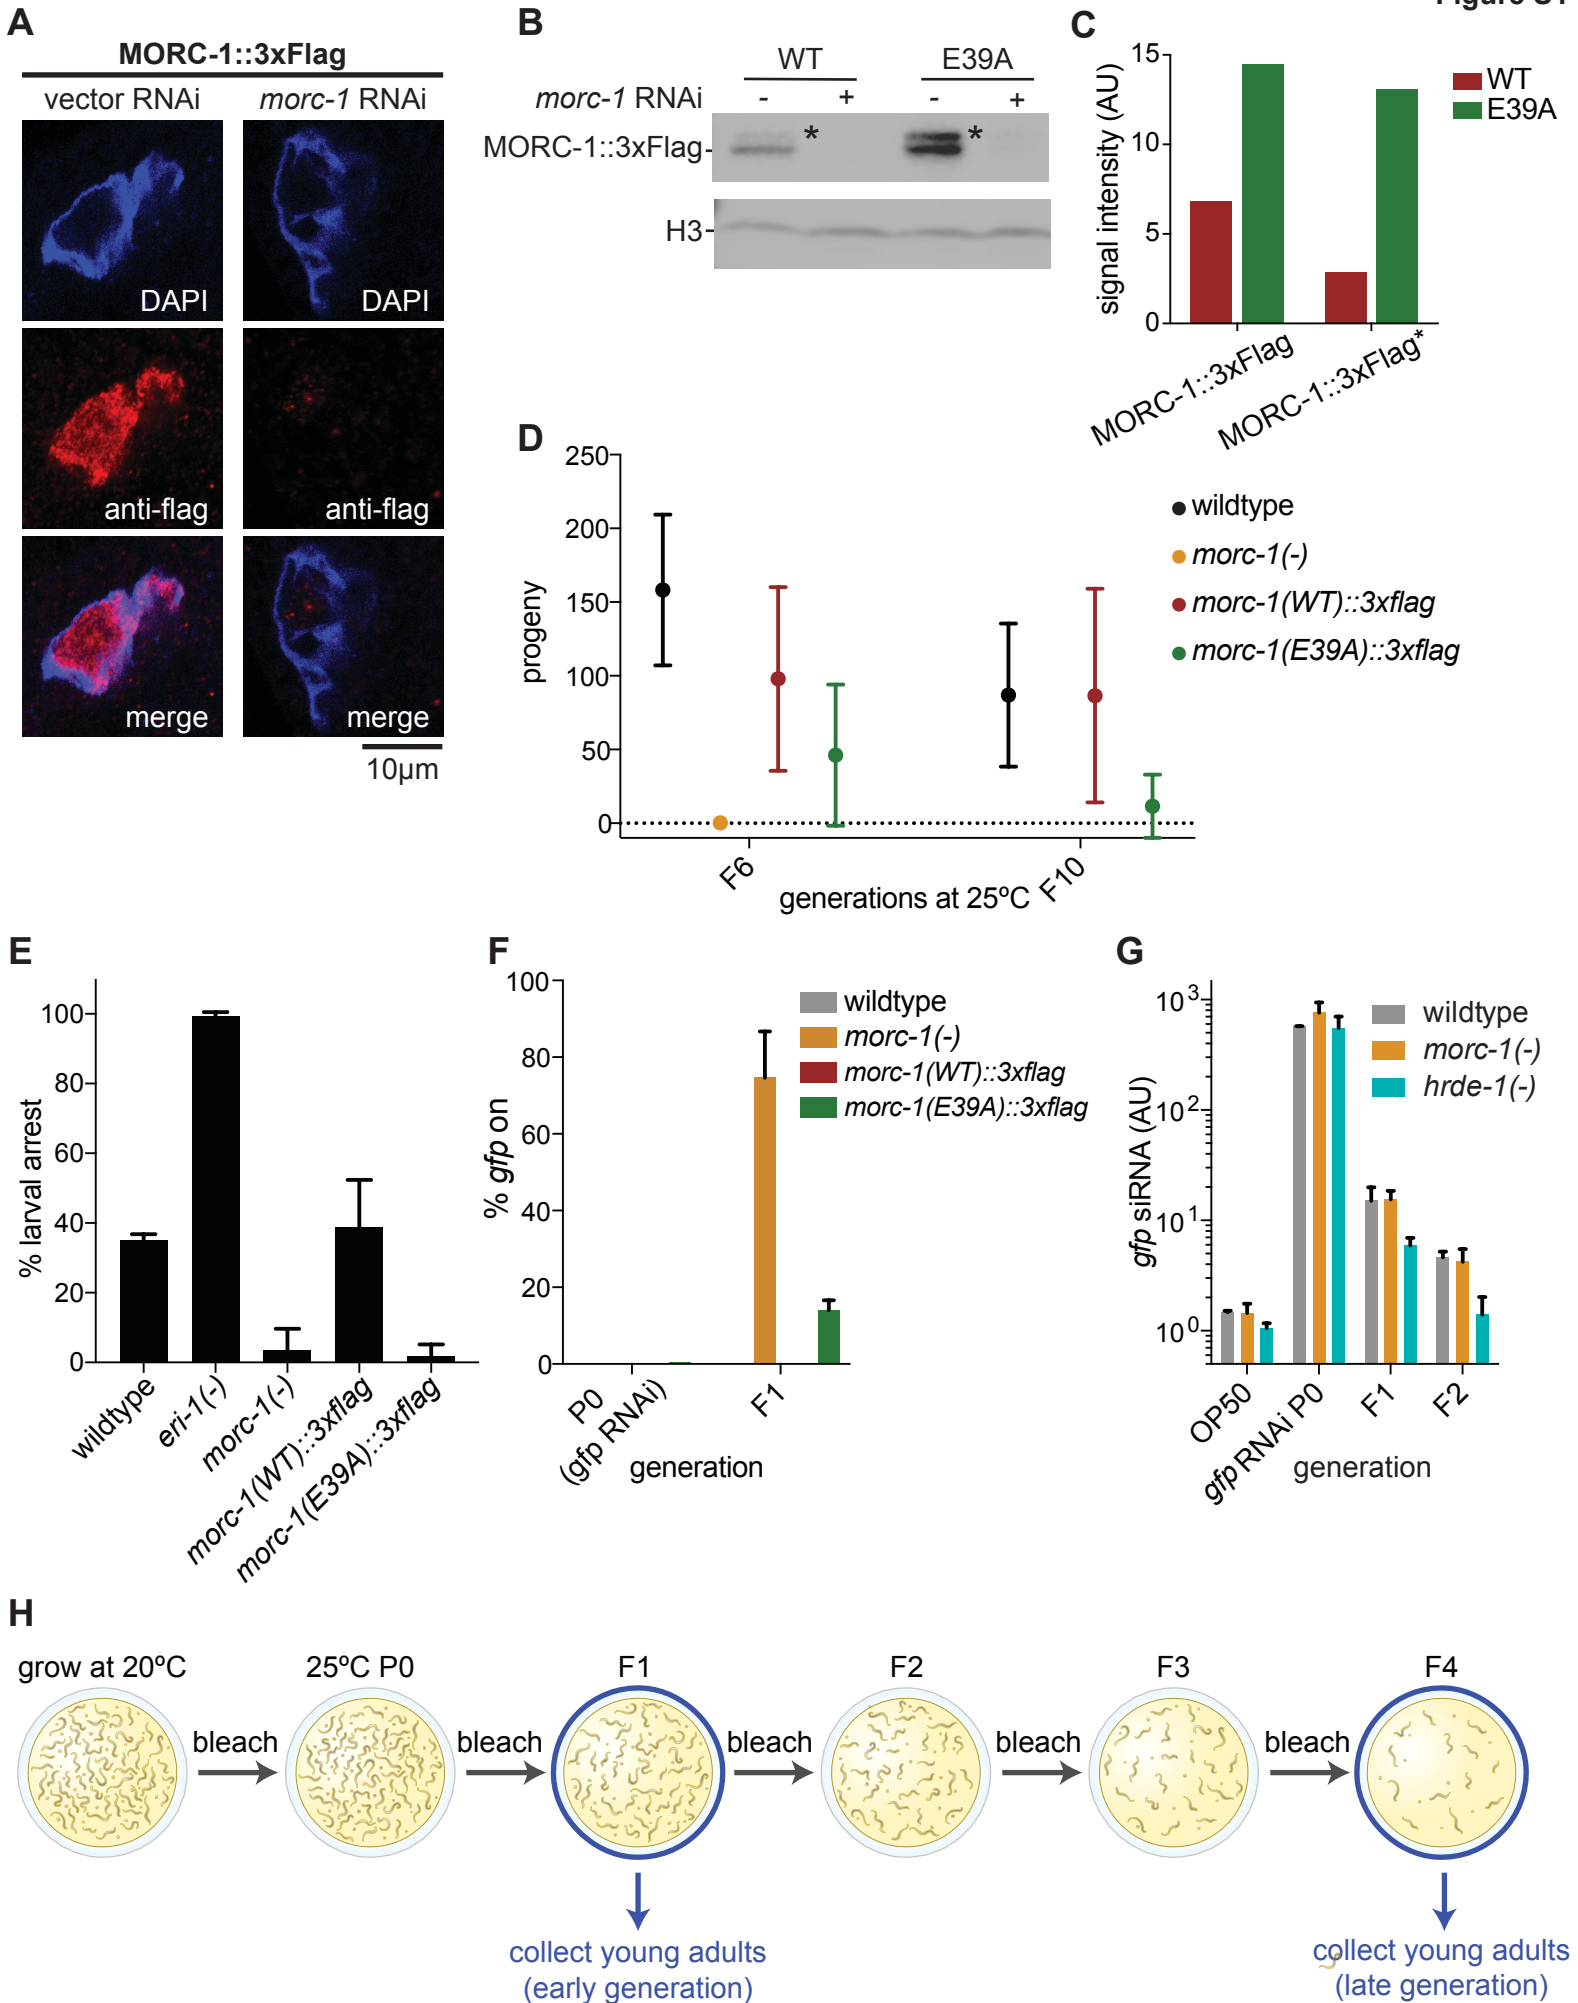

**Figure S1. Related to Figures 1, 2, 3, 5, and 6. MORC-1 is expressed in somatic nuclei, characterization of E39A variant, *morc-1* does not regulate siRNA accumulation, RNA-seq and ChIP-seq strategy overview. (A)** MORC-1::3xFlag is expressed in intestinal nuclei shown by anti-Flag immunofluorescence and DAPI staining of worms expressing *morc-1::3xflag* at the endogenous *morc-1* locus and grown for two generations on empty vector RNAi or on *morc-1* RNAi. **(B)** Western blot of worms expressing *morc-1(WT)::3xflag* and *morc-1(E39A)::3xflag* grown on vector or *morc-1* RNAi using anti-Flag antibody. Anti-H3 antibody was used as a loading control. Asterisk designates a higher molecular weight band that is eliminated by *morc-1* RNAi. This may indicate a post-translational modification or alternative isoform of MORC-1. Quantification of both bands by LI-COR Odyssey Fc is shown in **(C)**. **(D)** Fertility of designated genotype at F6 and F10 generations at 25°C. Mean fertility  $\pm$  SD of 12 worms per genotype per generation is shown. *morc-1(-)* mutants are sterile at F6, *morc-1(E39A)::3xflag* mutants are essentially sterile at F10, and *morc-1(WT)::3xflag* worms have wildtype fertility. **(E)** *morc-1(E39A)::3xflag* mutants are resistant to *lir-1* RNAi. *morc-1(WT)::3xflag* worms have wildtype sensitivity to *lir-1* RNAi. Bars indicate percentage of worms arrested or dead as a mean of three biological replicates  $\pm$  SD;  $n \geq 100$  **(F)** *morc-1(E39A)::3xflag* is defective for RNAi inheritance. On *gfp* RNAi, silencing of *gfp* is completely penetrant, but there is a mild defect in *gfp* silencing in the F1 generation. In *morc-1(-)* mutants, the majority of F1 worms express GFP. Silencing is completely penetrant in P0 and F1 generations in *morc-1(WT)::3xflag* and wildtype worms. Bars indicate percentage of worms expressing GFP as mean of three biological replicates  $\pm$  SD;  $n \geq 50$ . **(G)** Levels of anti-*gfp* siRNAs in adult worms grown on *gfp* RNAi and in F1 and F2 generations grown on OP50. siRNA levels measured by TaqMan qRT-PCR, normalized to U18, and shown in arbitrary units as mean of two technical replicates  $\pm$  SD. **(H)** Sample collection schematic for RNA-seq and ChIP-seq studies.



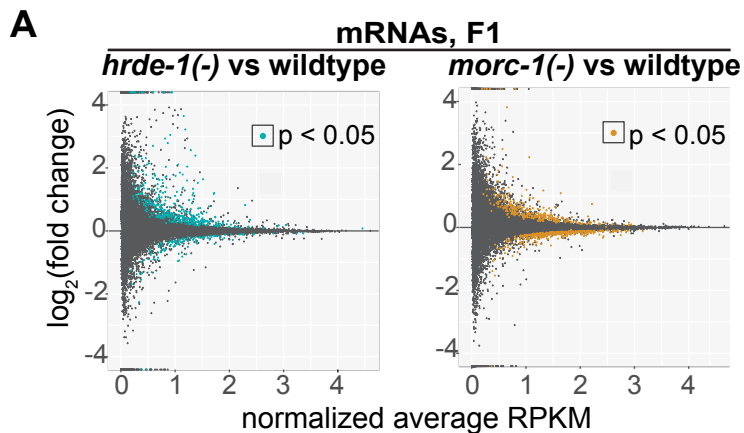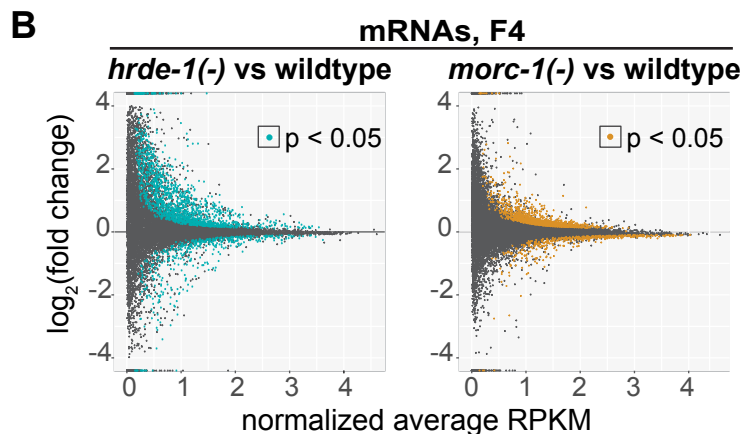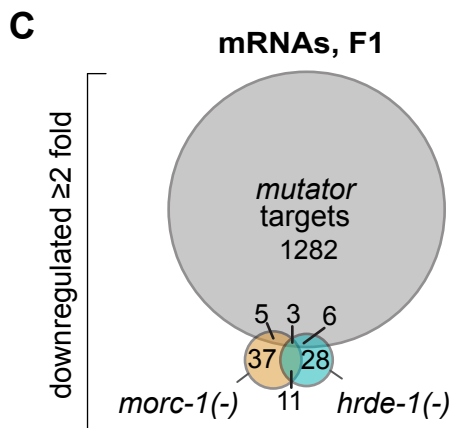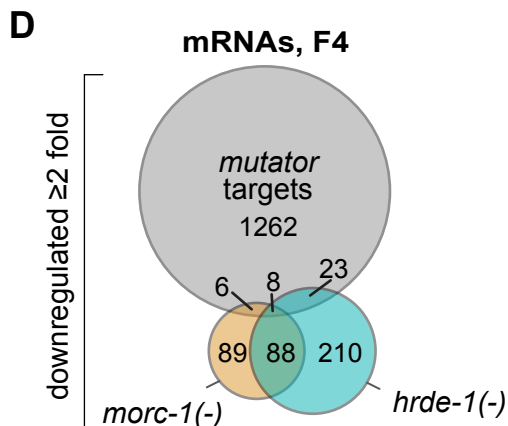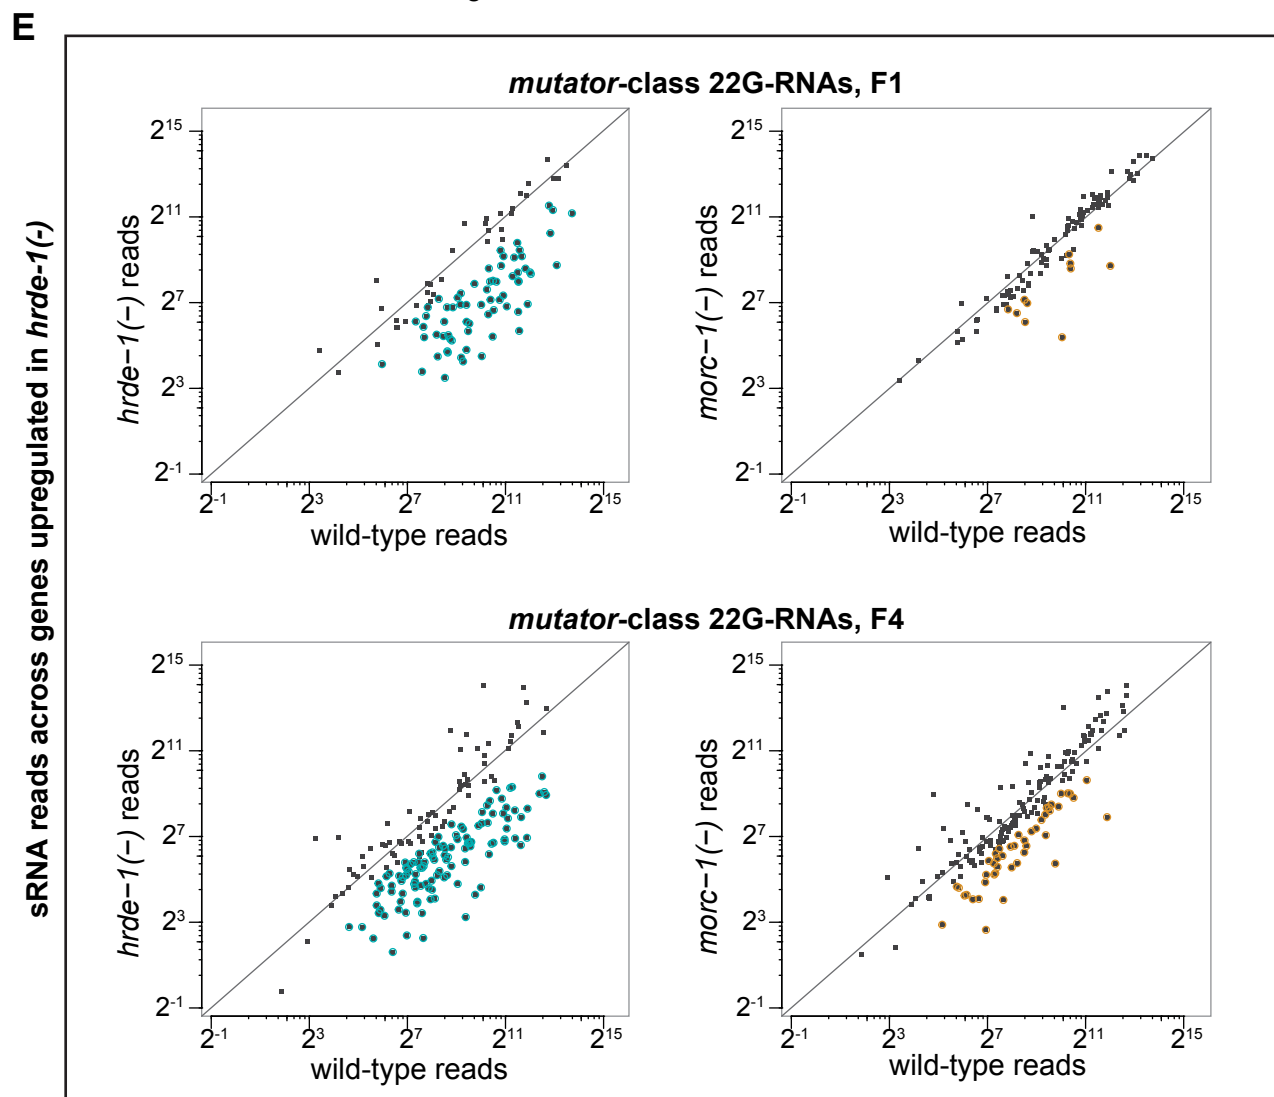

**Figure S2. Related to Figure 2. *morc-1* regulates 22G endo-siRNA targets. (A)** Log<sub>2</sub>(fold change) as a function of normalized average RPKM *hrde-1(-)* (left) and *morc-1(-)* (right) vs. wildtype in F1 generation. mRNAs that are up or down-regulated with  $p < 0.05$  in *hrde-1(-)* or *morc-1(-)* are indicated in blue and yellow, respectively. **(B)** Log<sub>2</sub>(fold change) as a function of normalized average RPKM *hrde-1(-)* (left) and *morc-1(-)* (right) vs. wildtype in F4 generation. mRNAs that are up or down-regulated with  $p < 0.05$  in *hrde-1(-)* or *morc-1(-)* are indicated in blue and yellow, respectively. **(C)** Overlap of testable *mutator* targets with downregulated mRNAs in *morc-1(-)* and *hrde-1(-)* in F1 and **(D)** F4. **(E)** 22G endo-siRNA levels corresponding to *mutator* targets that are upregulated in *hrde-1(-)* at F1 (top) and F4 (bottom) in *hrde-1(-)* and *morc-1(-)* vs. wildtype. Significantly depleted 22G endo-siRNAs in *hrde-1(-)* are highlighted in blue; significantly depleted 22G endo-siRNAs in *morc-1(-)* are highlighted in yellow.

**A**

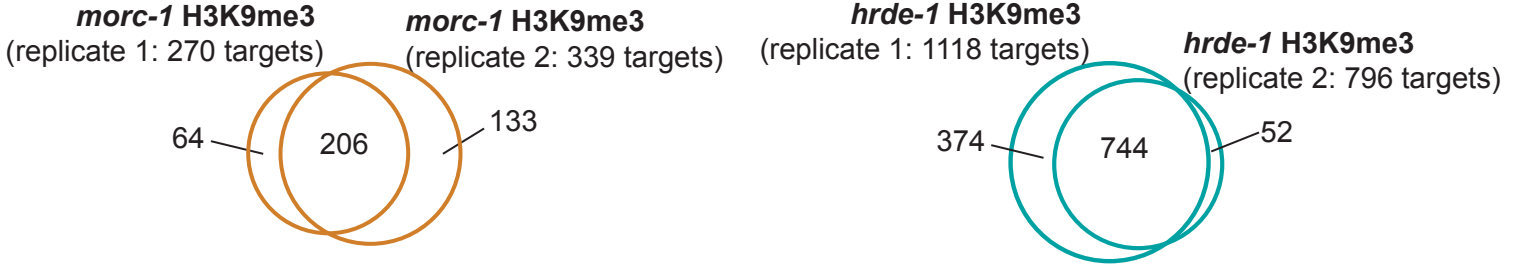

**B**

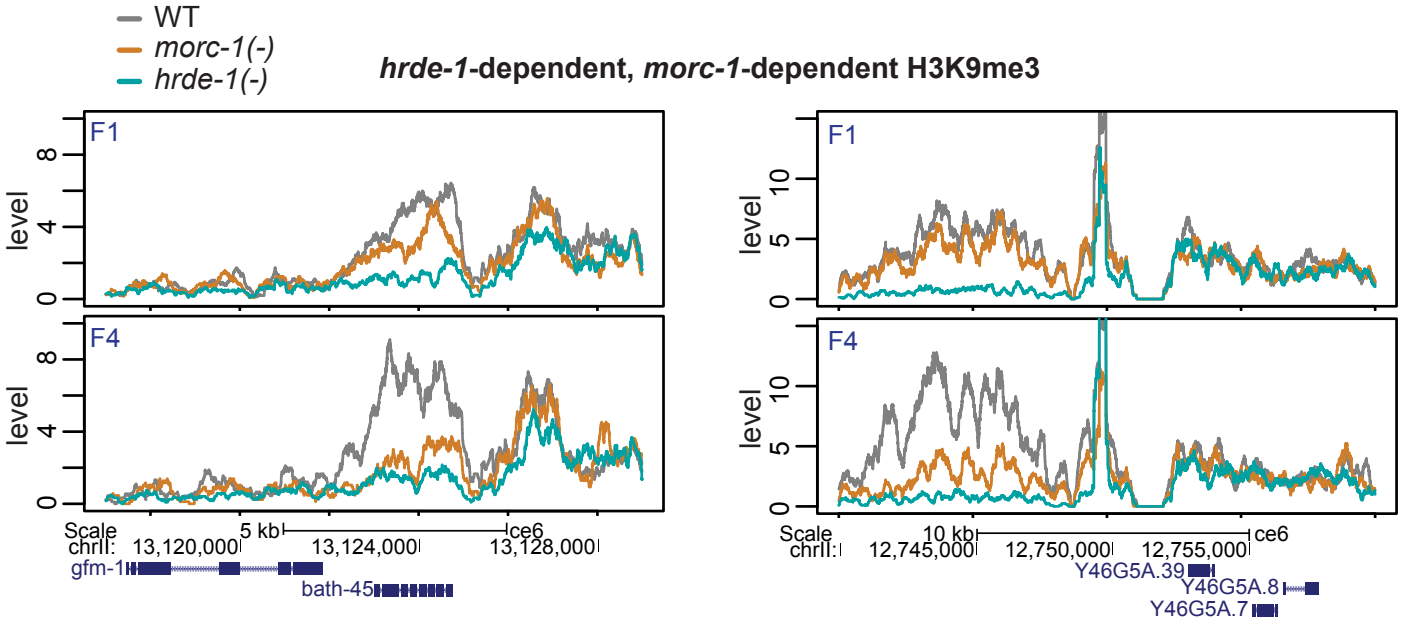

**C**

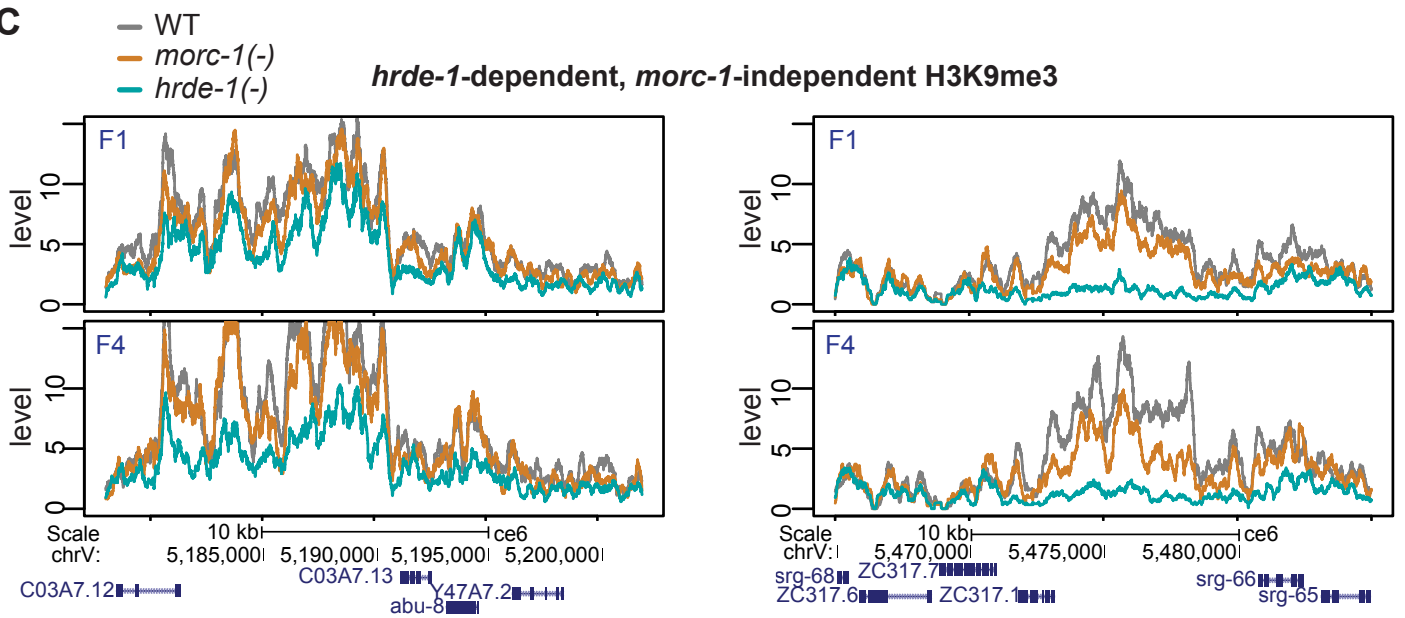

**Figure S3. Related to Figure 3. H3K9me3 replicate overlap and more exemplary regions. (A)** Overlap between biological replicates of H3K9me3-depleted regions (fold change >1.5, FDR<0.05) in F4 mutant vs. wildtype (top: *morc-1(-)* vs. wildtype, bottom: *hrde-1(-)* vs. wildtype). Subsequent analyses were performing using sites that were identified in both biological replicates. **(B)** H3K9me3 levels at exemplary *morc-1*-dependent H3K9me3 regions at early and late generation. **(C)** H3K9me3 levels at exemplary *hrde-1*-dependent, *morc-1*-independent H3K9me3 loci at early and late generation.

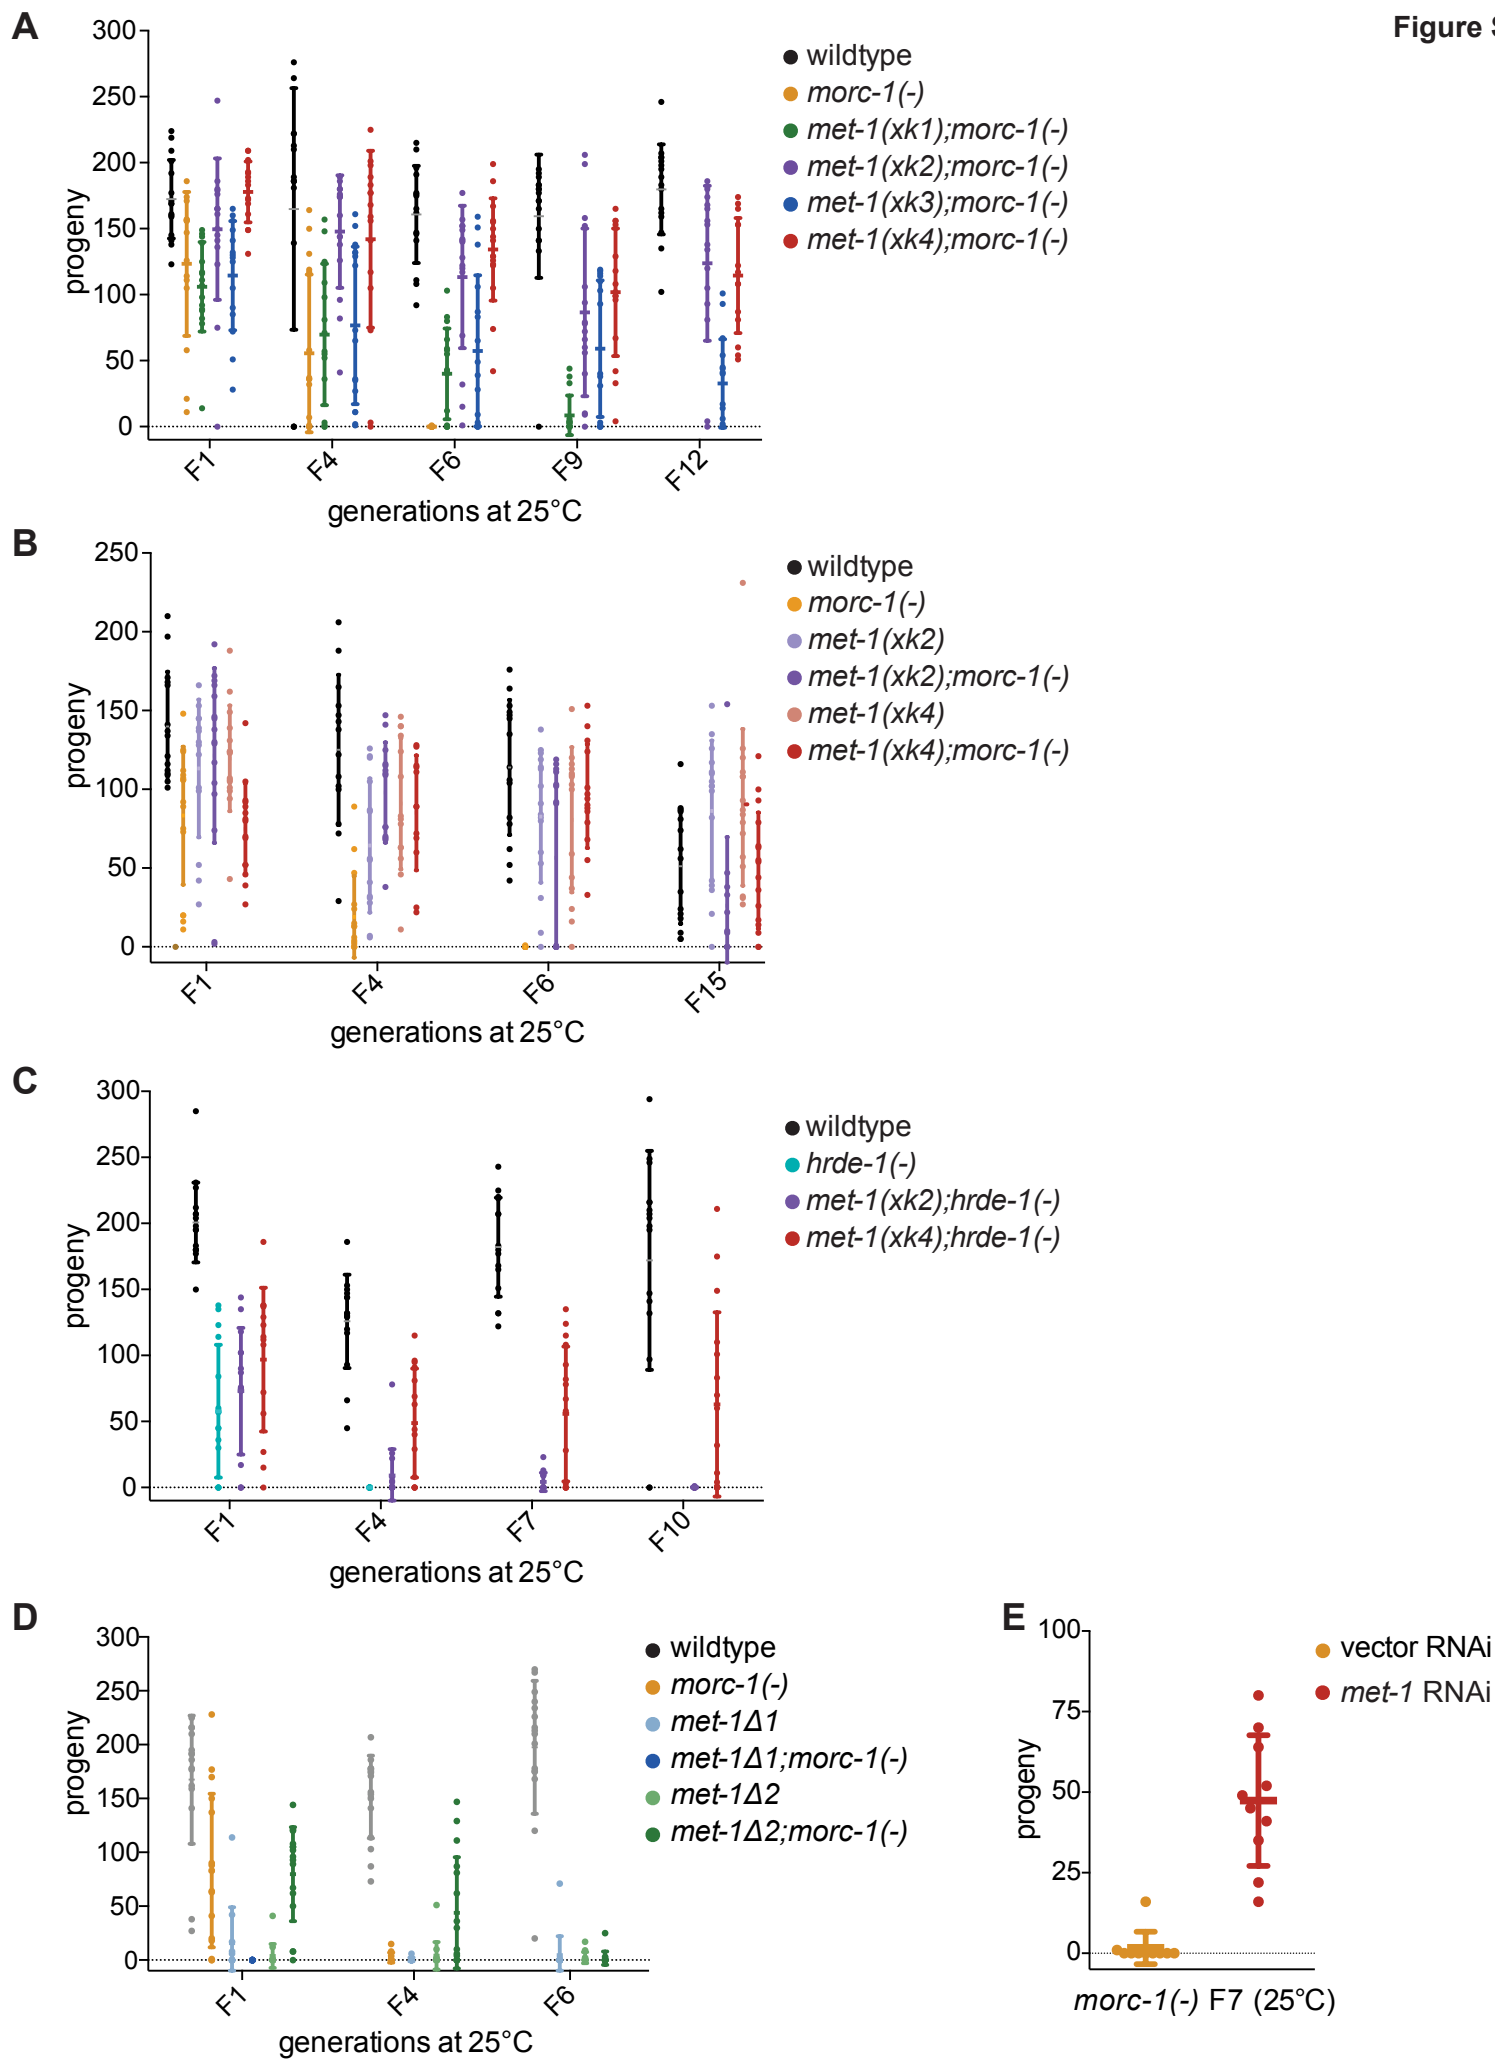

**Figure S4. Related to Figure 5. New *met-1* alleles, but not deletion alleles, suppress *morc-1(-)* and *hrde-1(-)* germline mortality.** Germline mortality assays showing fertility counts of individual worms at 25°C. **(A)** All four *met-1* alleles generated from the *morc-1* suppressor screen (*xk1-4*) rescue *morc-1(-)* germline mortality. **(B)** *met-1* alleles *xk2* and *xk4* rescue *morc-1(-)* germline mortality. *met-1(xk2)* and *met-1(xk4)* single mutants are fertile at 25°C. **(C)** *met-1* alleles *xk2* and *xk4* rescue *hrde-1(-)* germline mortality. **(D)** Deletion alleles of *met-1* cause severely reduced fertility at 25°C and do not rescue *morc-1(-)* germline mortality. **(E)** RNAi against *met-1* rescues the *morc-1(-)* fertility defect at F7. All error bars indicate mean  $\pm$  SD,  $n \geq 10$ .

**A** *morc-1(-)* H3K36me3 (*morc-1(-)* H3K36me3 (replicate 1: 104 targets) (*morc-1(-)* H3K36me3 (replicate 2: 90 targets) *hrde-1(-)* H3K36me3 (*hrde-1(-)* H3K36me3 (replicate 1: 525 targets) (*hrde-1(-)* H3K36me3 (replicate 2: 480 targets)

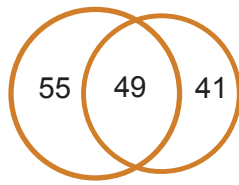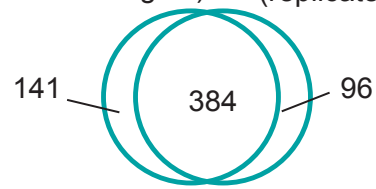

**B**

*hrde-1(-)*-dependent, *morc-1(-)*-dependent H3K36me3

— WT  
— *morc-1(-)*  
— *hrde-1(-)*

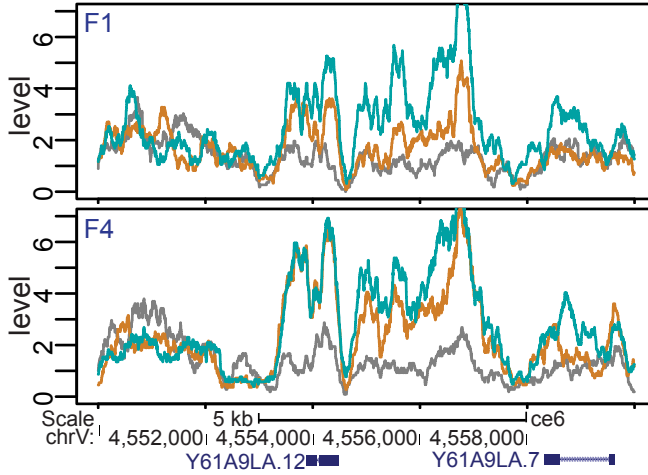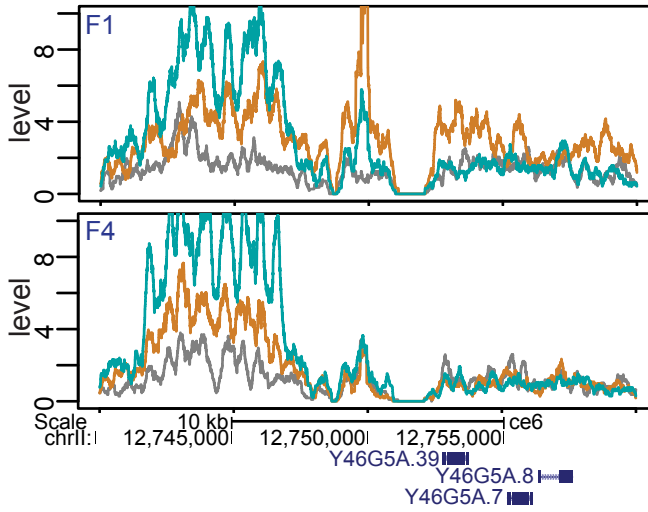

H3K36me3(+) control

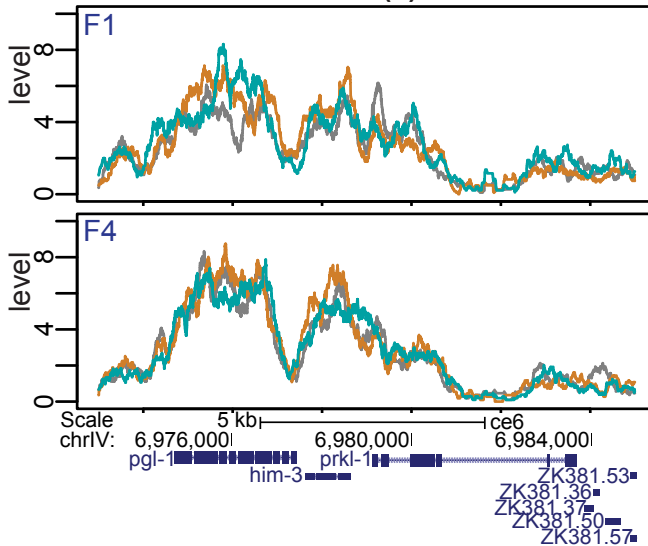

**C**

*hrde-1(-)*-dependent, *morc-1(-)*-independent H3K36me3

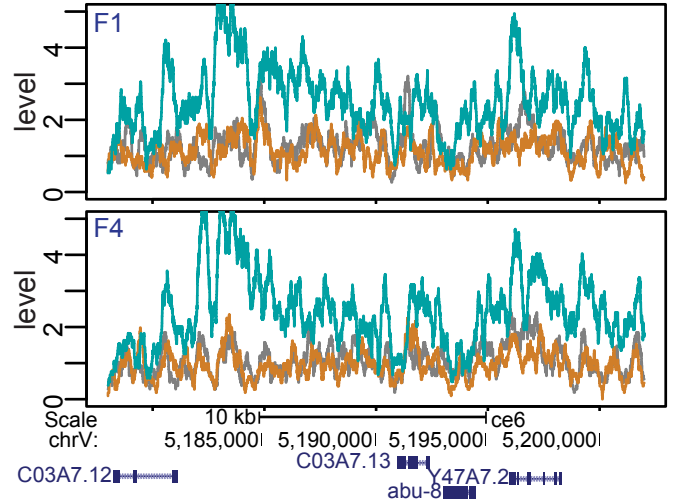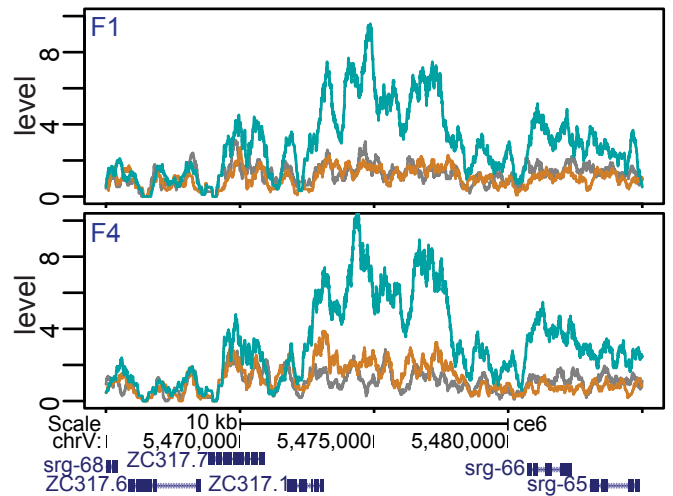



**Figure S5. Related to Figures 5 and 6. Regulation of H3K36me3 in *morc-1(-)* and *hrde-1(-)* mutants. (A)** Overlap between biological replicates of H3K36me3-enriched regions (fold-change>1.5, FDR<0.05) in F4 mutant compared to wildtype (top: *morc-1(-)* vs. wildtype, bottom: *hrde-1(-)* vs. wildtype). Subsequent analyses were performing using sites that were identified in both biological replicates. **(B)** H3K36me3 levels at exemplary *morc-1(-)*-dependent H3K36me3 regions in early and late generations. At an H3K36me3 positive control region, H3K36me3 levels are unaffected by loss of *morc-1* or *hrde-1*. **(C)** H3K36me3 levels at exemplary *hrde-1(-)*-dependent, *morc-1(-)*-independent H3K36me3 loci in early and late generations (bottom).

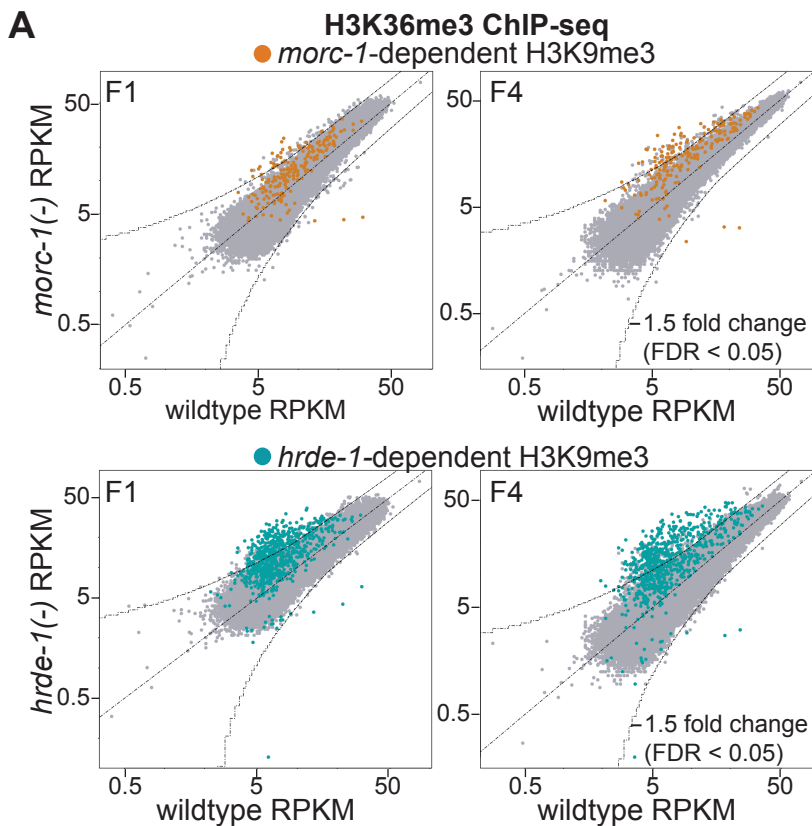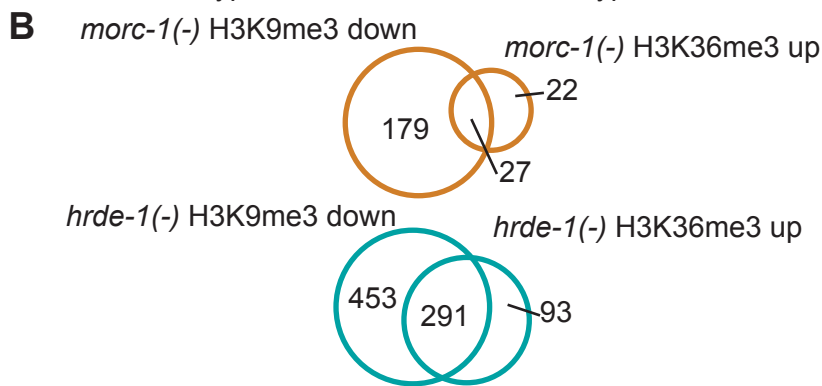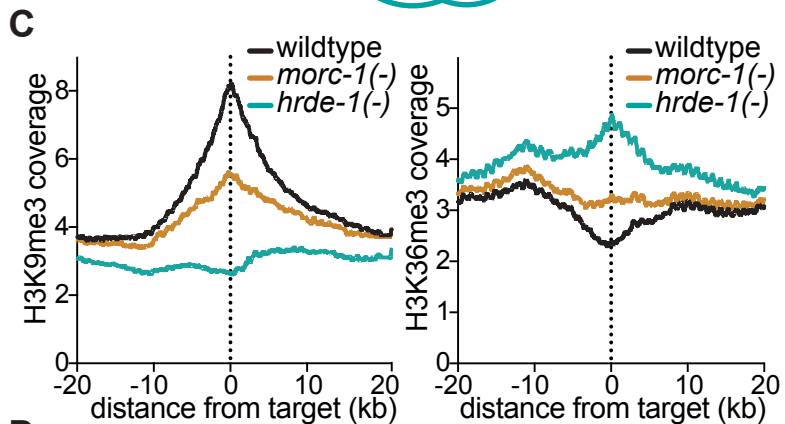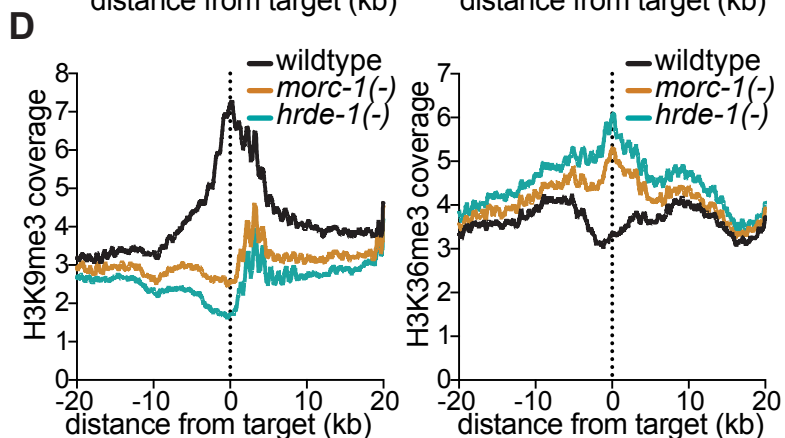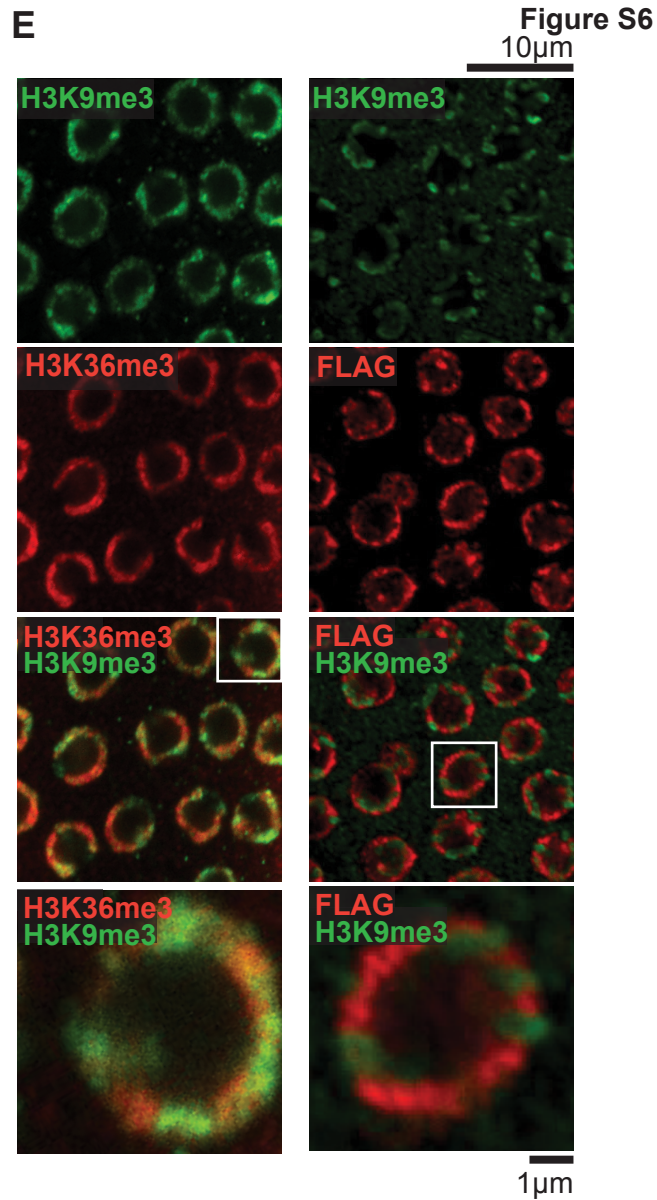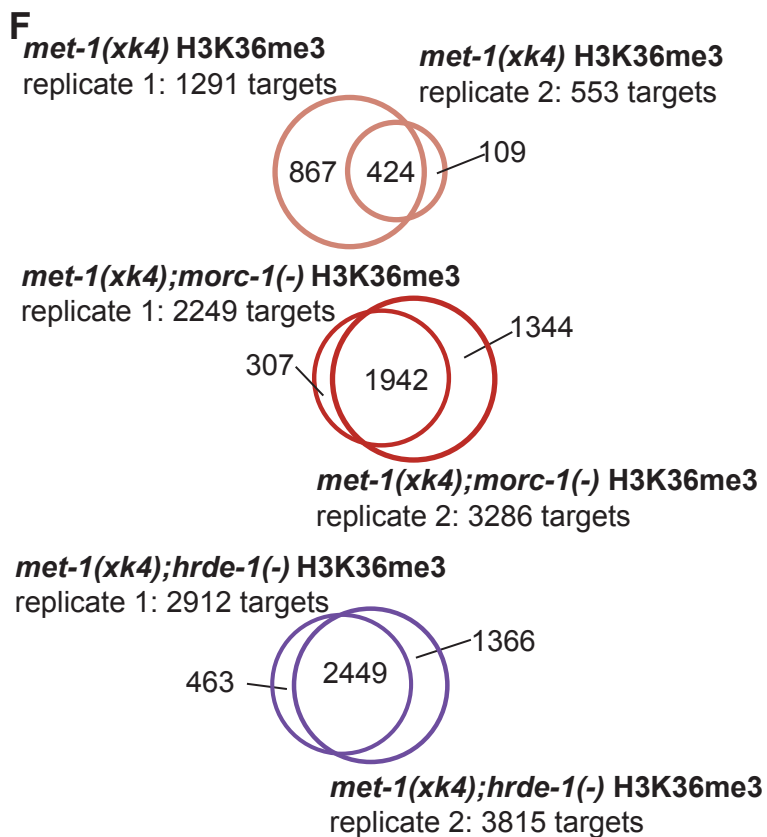

**Figure S6. Related to Figures 5 and 6. Correlation of changes in H3K9me3 and H3K36me3 levels in *morc-1(-)* and *hrde-1(-)* compared to wildtype. (A)** Scatter plots showing H3K36me3 levels in F1 and F4 *morc-1(-)* (top) and *hrde-1(-)* (bottom) vs. wildtype. Regions that are depleted of H3K9me3 in F4 *morc-1(-)* vs. wildtype in two biological replicates are highlighted in yellow. Regions that are depleted of H3K9me3 in F4 *hrde-1(-)* vs. wildtype in two biological replicates are highlighted in blue. **(B)** Overlap between loci that are depleted of H3K9me3 and targets that are enriched for H3K36me3 in late generation *morc-1(-)* (top) and *hrde-1(-)* (bottom) vs. wildtype. **(C)** H3K9me3 (left) and H3K36me3 (right) levels 20 kb upstream and downstream of *hrde-1*-dependent H3K9me3 loci in wildtype, *morc-1(-)*, and *hrde-1(-)* worms at F4 generation. **(D)** H3K9me3 (left) and H3K36me3 (right) levels 20 kb upstream and downstream of *morc-1*-dependent H3K9me3 loci in wildtype, *morc-1(-)*, and *hrde-1(-)* worms at F4 generation. **(E)** Co-immunostaining of H3K36me3 and H3K9me3 (left) resembles the pattern of MORC-1::3xFlag and H3K9me3, which is shown for reference, from a different experiment, at right. **(F)** Overlap of F4 regions that are >1.5-fold depleted of H3K36me3 with FDR<0.05 in two biological replicates of: *met-1(xk4)* vs. wildtype (top), *met-1(xk4);morc-1(-)* vs. *morc-1(-)* (middle), and *met-1(xk4);hrde-1(-)* vs. *hrde-1(-)* (bottom).

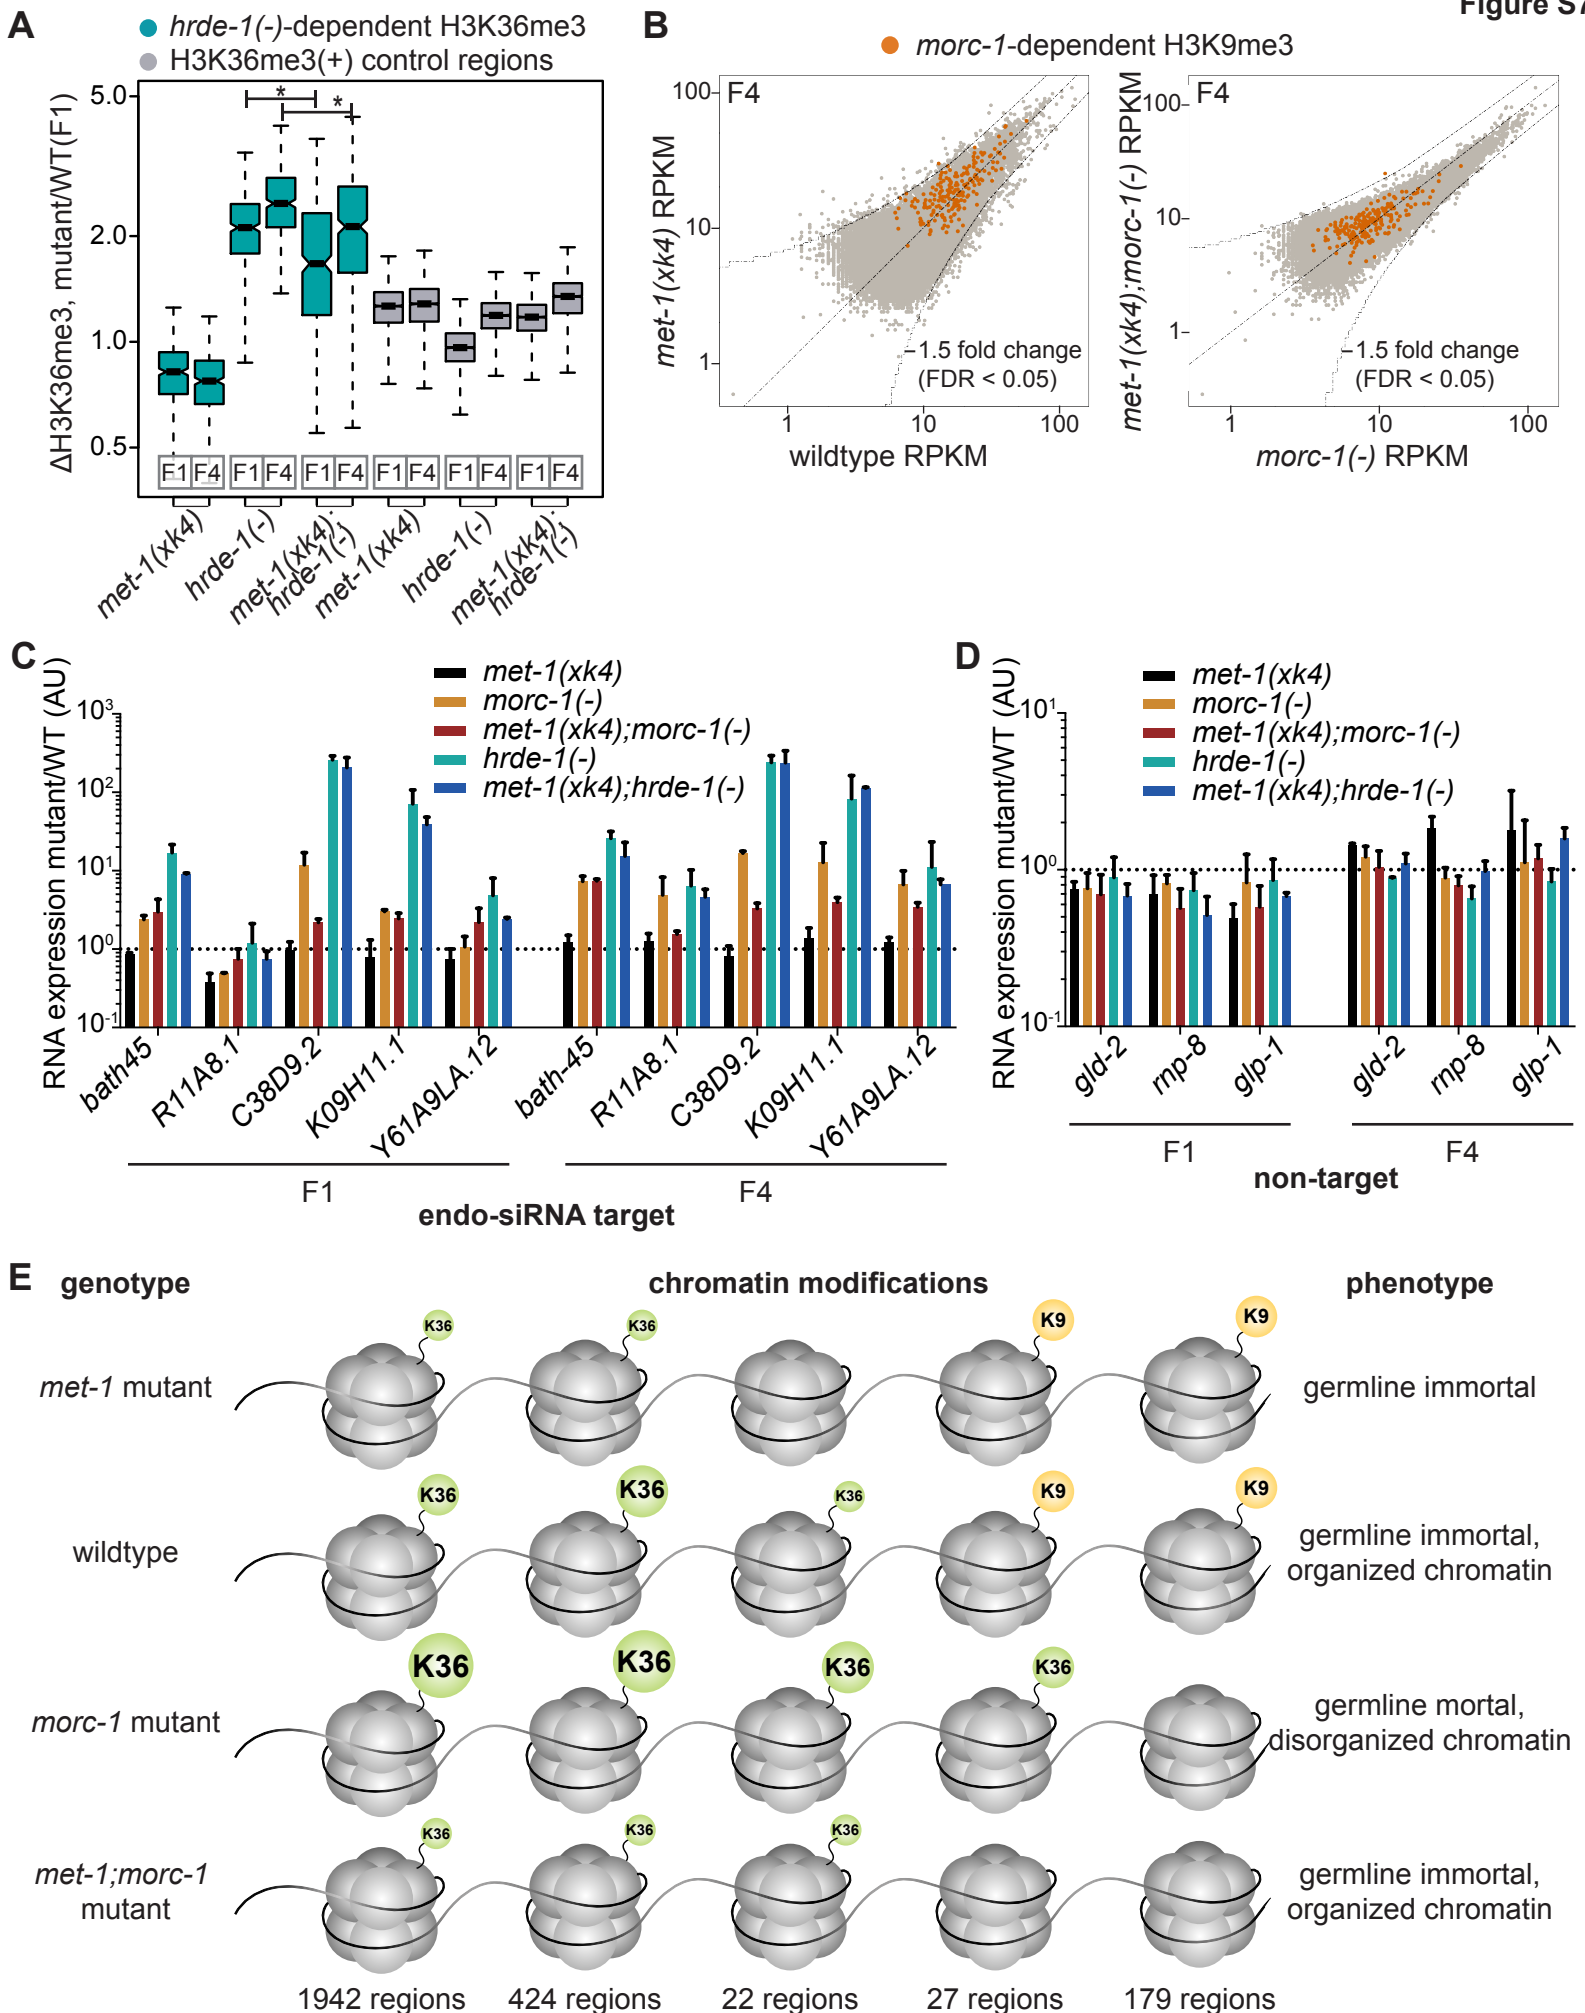

**Figure S7. Related to Figure 6. MET-1 drives H3K36me3 gain but not H3K9me3 loss or mRNA upregulation in nuclear RNAi mutants** **(A)** Box plot showing H3K36me3 levels at *hrde-1(-)*-dependent H3K36me3 loci in the indicated mutant background and generation relative to wildtype F1. These regions are significantly depleted in *met-1(xk4);hrde-1(-)* compared to *hrde-1(-)* at both generations (F1  $p=3.28 \times 10^{-14}$ , F4  $p=1.15 \times 10^{-10}$ , Welch's t-test). Gray boxes show H3K36me3 levels in regions with highest H3K36me3 in F1 wildtype. **(B)** Scatter plots comparing H3K9me3 levels in *met-1(xk4)* vs. wildtype (left) and *met-1(xk4);morc-1(-)* vs. *morc-1(-)* in F4 generation show that *met-1* does not affect H3K9me3 levels. Sites that were identified as *morc-1*-dependent for H3K9me3 (Figure 3A) are highlighted in yellow. **(C)** qRT-PCR of endo-siRNA target genes in the indicated mutant backgrounds in F1 and F4 generations. Expression levels were normalized to *eft-2* levels and are shown relative to wildtype of the indicated generation (mean  $\pm$  SD of two technical replicates). Levels of germline-expressed mRNAs that are not endo-siRNA targets are shown in **(D)**. **(E)** Model of MORC-1 and MET-1 effects on chromatin modifications and fertility.
